# Supplementary material
Source: PubMed Central journal article supplement (PMC4786350)
Supplement: supp_the2015-0279_Supplemental_Appendix.pdf [file supp_the2015-0279_Supplemental_Appendix.pdf]

Supplemental Appendix for:  
Awareness, Understanding, and Adoption of Precision Medicine to Deliver Personalized Treatment for Patients with Cancer:  
A Multinational Survey Comparison of Physicians and Patients  
Fortunato Ciardiello et al.

**Appendix S1.** Patient survey.

**Survey of Cancer Patients' Awareness and Understanding of Personalised Medicine**

**SCREENING QUESTIONNAIRE – v5 - FINAL**

|                            | <b>France<br/>N=</b> | <b>Germany<br/>N=</b> | <b>Italy<br/>N=</b> | <b>Spain<br/>N=</b> | <b>UK<br/>N=</b> | <b>Argentina<br/>N=</b> | <b>China<br/>N=</b> | <b>Total</b> |
|----------------------------|----------------------|-----------------------|---------------------|---------------------|------------------|-------------------------|---------------------|--------------|
| Breast cancer patients     | 18                   | 18                    | 18                  | 18                  | 18               | 35                      | 35                  | <b>160</b>   |
| Lung cancer patients       | 17                   | 17                    | 17                  | 17                  | 17               | 35                      | 35                  | <b>155</b>   |
| Colorectal cancer patients | 70                   | 70                    | 70                  | 70                  | 70               | 70                      | 70                  | <b>490</b>   |
| <b>TOTAL</b>               | <b>105</b>           | <b>105</b>            | <b>105</b>          | <b>105</b>          | <b>105</b>       | <b>140</b>              | <b>140</b>          | <b>805</b>   |

**INTRODUCTION**

*Good morning / afternoon / evening. My name is \_\_\_\_\_ and I'm working on behalf of Ipsos MORI, an independent market research agency. We are carrying out a study about cancer. We would be grateful if you could spare a few moments of your time to assist us in our research.*

*May I reassure you that this is a genuine piece of market research, I am not trying to sell you anything and the information will be used for research purposes only.*

*To begin I will ask you a few questions to see if you qualify for the study. These qualification questions will take just a few minutes to answer. The main interview will take approximately 15 minutes to complete.*

*I will be recording the interviews for note-taking purposes but everything you say will be kept confidential and anonymous. Please feel free to stop the interview at any time if you do not wish to continue.*

## S2. When were you first diagnosed with cancer?

[PN: SINGLE CODE]

[INTERVIEWER NOTE: READ OUT ANSWER CHOICES]

|                        |                             |                 |
|------------------------|-----------------------------|-----------------|
| In the last year       | 1. <input type="checkbox"/> | CONTINUE        |
| Between 1-2 years ago  | 2. <input type="checkbox"/> | CONTINUE        |
| Between 2-3 years ago  | 3. <input type="checkbox"/> | CONTINUE        |
| Between 4-5 years ago  | 4. <input type="checkbox"/> | CONTINUE        |
| More than 5 years ago  | 5. <input type="checkbox"/> | THANK AND CLOSE |
| Don't know DO NOT READ | 6. <input type="checkbox"/> | THANK AND CLOSE |

## S3. How long have you been in treatment for cancer?

[PN: SINGLE CODE]

[INTERVIEWER NOTE: READ OUT ANSWER CHOICES]

|                        |                             |                 |
|------------------------|-----------------------------|-----------------|
| In the last year       | 1. <input type="checkbox"/> | CONTINUE        |
| Between 1-2 years ago  | 2. <input type="checkbox"/> | CONTINUE        |
| Between 2-3 years ago  | 3. <input type="checkbox"/> | CONTINUE        |
| Between 4-5 years ago  | 4. <input type="checkbox"/> | CONTINUE        |
| Don't know DO NOT READ | 6. <input type="checkbox"/> | THANK AND CLOSE |

## S4. What type of cancer do you have?

[PN: SINGLE CODE]

[INTERVIEWER NOTE: READ OUT ANSWER CHOICES]

|                          |                             |                                            |
|--------------------------|-----------------------------|--------------------------------------------|
| Breast cancer            | 1. <input type="checkbox"/> | RECRUIT TO BC QUOTA                        |
| Lung cancer              | 2. <input type="checkbox"/> | RECRUIT TO NSCLC QUOTA                     |
| Colorectal/ bowel cancer | 3. <input type="checkbox"/> | RECRUIT TO mCRC                            |
| Another type of cancer   | 4. <input type="checkbox"/> | THANK AND CLOSE IF ONE OF 1-3 NOT SELECTED |
| Don't know DO NOT READ   | 5. <input type="checkbox"/> | THANK AND CLOSE                            |

[ONLY RESPONDENTS WHO HAVE HAD BREAST, LUNG OR COLORECTAL CANCER IN THE LAST 5 YEARS WILL PROCEED TO THE REST OF THE SURVEY]

**S5. Do you have any friends or family members who have/had cancer?**

[PN: MULTICODE POSSIBLE]

|               |                             |
|---------------|-----------------------------|
| Friend        | 1. <input type="checkbox"/> |
| Family member | 2. <input type="checkbox"/> |
| Don't know    | 5. <input type="checkbox"/> |

ASK THOSE WHO HAVE A FRIEND OR FAMILY MEMBER WITH CANCER

**S6. What type of cancer did your FRIEND / FAMILY MEMBER have?**

OPEN ENDED QUESTION

**CONTINUE TO MAIN QUESTIONNAIRE**

Survey of Cancer Patients' Awareness and Understanding of Personalised Medicine

MAIN QUESTIONNAIRE – v3

SECTION A: ASSESSING AWARENESS OF CANCER TREATMENT

ASK ALL

1. Which one of the following statements do you believe to be correct?

[PN: SINGLE CODE ONLY]

[INTERVIEWER NOTE: READ OUT ANSWER CHOICES]

|                                                                                                                                                                                                                                                                                    |                             |
|------------------------------------------------------------------------------------------------------------------------------------------------------------------------------------------------------------------------------------------------------------------------------------|-----------------------------|
| There is only one type of cancer, and it is the same regardless of where it appears in the body                                                                                                                                                                                    | 1. <input type="checkbox"/> |
| There are different types of cancer, but cancers that affect one organ (e.g. the lungs) are always the same                                                                                                                                                                        | 2. <input type="checkbox"/> |
| There are different types of cancer that can affect a single organ and the types of cancer affecting one organ are different than the types of cancer affecting a different organ, e.g. there are different types of breast cancer and breast cancer is different from lung cancer |                             |
| Don't know / Refused [INTERVIEWER NOTE: DO NOT READ]                                                                                                                                                                                                                               | 3. <input type="checkbox"/> |

ASK ALL

2. Which one of the following statements do you believe to be correct?

[PN: SINGLE CODE ONLY]

[INTERVIEWER NOTE: READ OUT ANSWER CHOICES]

|                                                        |                             |
|--------------------------------------------------------|-----------------------------|
| All cancer drugs can target only cancer cells          | 1. <input type="checkbox"/> |
| All cancer drugs affect healthy cells and cancer cells | 2. <input type="checkbox"/> |

|                                                      |                             |
|------------------------------------------------------|-----------------------------|
| Some cancer drugs can target only cancer cells       | 3. <input type="checkbox"/> |
| Don't know / Refused [INTERVIEWER NOTE: DO NOT READ] | 4. <input type="checkbox"/> |

ASK ALL

**3. Which one of the following statements do you believe to be correct?**

[PN: SINGLE CODE ONLY]

[INTERVIEWER NOTE: READ OUT ANSWER CHOICES]

|                                                                      |                             |
|----------------------------------------------------------------------|-----------------------------|
| All cancer drugs work equally well in all cancer patients            | 1. <input type="checkbox"/> |
| Some cancer drugs work better in some cancer patients than in others | 2. <input type="checkbox"/> |
| Don't know / Refused [INTERVIEWER NOTE: DO NOT READ]                 | 3. <input type="checkbox"/> |

## SECTION B: ASSESSING AWARENESS OF PERSONALISED MEDICINE

ASK ALL

**4. Which one of the following statements do you believe to be correct?**

[PN: SINGLE CODE ONLY]

[INTERVIEWER NOTE: READ OUT ANSWER CHOICES]

|                                                                                                               |                             |
|---------------------------------------------------------------------------------------------------------------|-----------------------------|
| A person can be tested to see whether a particular cancer drug could work for them                            | 1. <input type="checkbox"/> |
| There is no method of testing to determine which cancer treatments might work (or work better) in some people | 2. <input type="checkbox"/> |

Don't know / Refused [INTERVIEWER NOTE: DO NOT READ]

3.

ASK ALL

**5. Do you think it's possible in some circumstances for a person to have their tumour tested to help their doctor decide which treatment(s) to give?**

[PN: SINGLE CODE]

[INTERVIEWER NOTE: READ OUT ANSWER CHOICES]

|                                                      |                             |
|------------------------------------------------------|-----------------------------|
| Yes                                                  | 1. <input type="checkbox"/> |
| No                                                   | 2. <input type="checkbox"/> |
| Don't know / Refused [INTERVIEWER NOTE: DO NOT READ] | 3. <input type="checkbox"/> |

ASK ALL

**6. Did your doctor perform any tests to help him/her understand which treatment could work best for you?**

[PN: SINGLE CODE]

[INTERVIEWER NOTE: READ OUT ANSWER CHOICES]

|                                                      |                             |                |
|------------------------------------------------------|-----------------------------|----------------|
| Yes                                                  | 1. <input type="checkbox"/> | CONTINUE TO Q7 |
| No                                                   | 2. <input type="checkbox"/> | CONTINUE TO Q8 |
| Don't remember                                       | 3. <input type="checkbox"/> | CONTINUE TO Q8 |
| Don't know / Refused [INTERVIEWER NOTE: DO NOT READ] | 4. <input type="checkbox"/> | CONTINUE TO Q8 |

ASK ALL CODING 1 at Q6

**7. Which of the following tests, if any, were performed?**

Please choose all that apply.

[PN: MULTICODE POSSIBLE]

[INTERVIEWER NOTE: READ OUT ANSWER CHOICES]

|                                                              |                              |
|--------------------------------------------------------------|------------------------------|
| EGFR test                                                    | 1. <input type="checkbox"/>  |
| EGFR expression test                                         | 2. <input type="checkbox"/>  |
| EGFR mutation test                                           | 3. <input type="checkbox"/>  |
| KRAS test                                                    | 4. <input type="checkbox"/>  |
| HER2 test                                                    | 5. <input type="checkbox"/>  |
| Hormone receptor test                                        | 6. <input type="checkbox"/>  |
| Biological therapy receptor test                             | 7. <input type="checkbox"/>  |
| Additional tumour biopsy                                     | 8. <input type="checkbox"/>  |
| Other (please specify)                                       | 9. <input type="checkbox"/>  |
| Don't know [PN: SINGLE CODE] [INTERVIEWER NOTE: DO NOT READ] | 10. <input type="checkbox"/> |

## SECTION C: ASSESSING WILLINGNESS TOWARDS PERSONALISED MEDICINE APPROACH

ASK ALL

**8. Would you be prepared to delay your treatment for additional tumour testing if there was a chance you could receive a drug that might work better for you?**

[PN: SINGLE CODE]

[INTERVIEWER NOTE: READ OUT ANSWER CHOICES]

|                                                      |                             |                 |
|------------------------------------------------------|-----------------------------|-----------------|
| Yes                                                  | 1. <input type="checkbox"/> | CONTINUE TO Q9  |
| No                                                   | 2. <input type="checkbox"/> | CONTINUE TO Q10 |
| Don't know / Refused [INTERVIEWER NOTE: DO NOT READ] | 3. <input type="checkbox"/> | CONTINUE TO Q10 |

ASK ALL SELECTING YES AT Q8

**9. How long would you be willing to delay it for?**

[PN: SINGLE CODE]

[INTERVIEWER NOTE: READ OUT ANSWER CHOICES]

|                                                      |                             |
|------------------------------------------------------|-----------------------------|
| 3-4 days                                             | 1. <input type="checkbox"/> |
| Up to one week                                       | 2. <input type="checkbox"/> |
| Up to two weeks                                      | 3. <input type="checkbox"/> |
| Up to a month                                        | 4. <input type="checkbox"/> |
| As long as it takes                                  | 5. <input type="checkbox"/> |
| Don't know / Refused [INTERVIEWER NOTE: DO NOT READ] | 6. <input type="checkbox"/> |

ASK ALL

**10. Would you be prepared for the doctor to perform a tumour re-biopsy if there was a chance you could receive a drug that might work better for you?**

[PN: SINGLE CODE]

[INTERVIEWER NOTE: READ OUT ANSWER CHOICES]

|                                                      |                             |
|------------------------------------------------------|-----------------------------|
| Yes                                                  | 1. <input type="checkbox"/> |
| No                                                   | 2. <input type="checkbox"/> |
| Don't know / Refused [INTERVIEWER NOTE: DO NOT READ] | 3. <input type="checkbox"/> |



ASK ALL

**11. Would you allow a hospital to keep a sample of your cancer for future research?**

[PN: SINGLE CODE]

[INTERVIEWER NOTE: READ OUT ANSWER CHOICES]

|                                                      |                             |
|------------------------------------------------------|-----------------------------|
| Yes                                                  | 1. <input type="checkbox"/> |
| No                                                   | 2. <input type="checkbox"/> |
| Don't know / Refused [INTERVIEWER NOTE: DO NOT READ] | 3. <input type="checkbox"/> |

**SECTION D: ASSESSING DESIRE FOR INFORMATION AND WILLINGNESS TO TAKE PART IN TREATMENT DECISIONS**

ASK ALL

**12. Would you want your doctor to give you information about all of the available treatment options for your cancer?**

[PN: SINGLE CODE]

[INTERVIEWER NOTE: READ OUT ANSWER CHOICES]

|                                                      |                             |                 |
|------------------------------------------------------|-----------------------------|-----------------|
| Yes                                                  | 1. <input type="checkbox"/> | CONTINUE TO Q13 |
| No                                                   | 2. <input type="checkbox"/> | CONTINUE TO Q14 |
| Don't know / Refused [INTERVIEWER NOTE: DO NOT READ] | 3. <input type="checkbox"/> | CONTINUE TO Q14 |

ASK ALL SELECTING YES AT Q12

**13. If yes, why would that be? Please choose all that apply.**

[PN: MULTI CODE]

[INTERVIEWER NOTE: READ OUT ANSWER CHOICES]

|                                                                                                                                |                             |
|--------------------------------------------------------------------------------------------------------------------------------|-----------------------------|
| For general information / education                                                                                            | 1. <input type="checkbox"/> |
| So that I can be involved in decisions about my treatment                                                                      | 2. <input type="checkbox"/> |
| To be aware of potential side effects                                                                                          | 3. <input type="checkbox"/> |
| I would want a little information for reference, but would prefer my doctor to make all major decisions about treatment for me | 4. <input type="checkbox"/> |
| Other (please specify)                                                                                                         | 5. <input type="checkbox"/> |
| Don't know / Refused                                                                                                           | 6. <input type="checkbox"/> |

ASK ALL

**14. Do / did you feel fully informed and understand your treatment when it was explained to you by your doctor?**

[PN: SINGLE CODE]

[INTERVIEWER NOTE: READ OUT ANSWER CHOICES]

|                                                      |                             |
|------------------------------------------------------|-----------------------------|
| Yes                                                  | 1. <input type="checkbox"/> |
| No                                                   | 2. <input type="checkbox"/> |
| Don't know / Refused [INTERVIEWER NOTE: DO NOT READ] | 3. <input type="checkbox"/> |

ASK ALL

**15. What sources were most useful to you in providing clear information about your cancer and treatment options?**

*Please choose all that apply.*

[PN: MULTI CODE]

[INTERVIEWER NOTE: READ OUT ANSWER CHOICES]

|                                                      |                             |
|------------------------------------------------------|-----------------------------|
| Family, friends                                      | 1. <input type="checkbox"/> |
| Your doctor (oncologist, family doctor etc.)         | 2. <input type="checkbox"/> |
| Your nurse                                           | 3. <input type="checkbox"/> |
| Support groups                                       | 4. <input type="checkbox"/> |
| Internet sites                                       | 5. <input type="checkbox"/> |
| Newspaper or magazine articles                       | 6. <input type="checkbox"/> |
| Other (please specify)                               | 7. <input type="checkbox"/> |
| None [PN: EXCLUSIVE]                                 | 8. <input type="checkbox"/> |
| Don't know / Refused [INTERVIEWER NOTE: DO NOT READ] | 9. <input type="checkbox"/> |

## SECTION E: DEMOGRAPHICS

**The survey is almost complete, I have just a few more demographic questions.**

ASK ALL

**16. What is your age?**  
*Please select one answer.*

[PN: SINGLE CODE]

[INTERVIEWER NOTE: READ OUT ANSWER CHOICES]

|                                                       |                             |
|-------------------------------------------------------|-----------------------------|
| Under 18                                              | 1. <input type="checkbox"/> |
| 18 – 24                                               | 2. <input type="checkbox"/> |
| 25 – 35                                               | 3. <input type="checkbox"/> |
| 36 – 45                                               | 4. <input type="checkbox"/> |
| 46 – 55                                               | 5. <input type="checkbox"/> |
| Over 55                                               | 6. <input type="checkbox"/> |
| Prefer not to specify [INTERVIEWER NOTE: DO NOT READ] | 7. <input type="checkbox"/> |

[INTERVIEWER NOTE: DO NOT READ]

### 17. RECORD GENDER

[PN: SINGLE CODE]

|        |                             |
|--------|-----------------------------|
| Male   | 1. <input type="checkbox"/> |
| Female | 2. <input type="checkbox"/> |

### 18. Which of the following best describes the highest level of education that you have completed?

*Please select one answer.*

[PN: SINGLE CODE]

#### UK/SPAIN/ITALY/GERMANY/FRANCE ONLY:

|                                                |                             |
|------------------------------------------------|-----------------------------|
| Secondary school or earlier                    | 1. <input type="checkbox"/> |
| Vocational/technical education                 | 2. <input type="checkbox"/> |
| Higher education below university degree level | 3. <input type="checkbox"/> |

|                                                             |                             |
|-------------------------------------------------------------|-----------------------------|
| University degree (Including polytechnic or college degree) | 4. <input type="checkbox"/> |
| Prefer not to specify [INTERVIEWER NOTE: DO NOT READ]       | 5. <input type="checkbox"/> |

**ARGENTINA ONLY:**

|                                                       |                              |
|-------------------------------------------------------|------------------------------|
| No studies                                            | 1. <input type="checkbox"/>  |
| Incomplete Primary School                             | 2. <input type="checkbox"/>  |
| Complete Primary School                               | 3. <input type="checkbox"/>  |
| Incomplete Secondary School                           | 4. <input type="checkbox"/>  |
| Complete Secondary School                             | 5. <input type="checkbox"/>  |
| Incomplete Tertiary (Higher) School                   | 6. <input type="checkbox"/>  |
| Incomplete University                                 | 7. <input type="checkbox"/>  |
| Complete Tertiary School                              | 8. <input type="checkbox"/>  |
| Complete University                                   | 9. <input type="checkbox"/>  |
| Post-graduation                                       | 10. <input type="checkbox"/> |
| Prefer not to specify [INTERVIEWER NOTE: DO NOT READ] | 11. <input type="checkbox"/> |

**CHINA ONLY:**

|                                                                            |                             |
|----------------------------------------------------------------------------|-----------------------------|
| Primary school                                                             | 1. <input type="checkbox"/> |
| Junior middle school                                                       | 2. <input type="checkbox"/> |
| Senior secondary / senior middle school / high school or vocational school | 3. <input type="checkbox"/> |
| University or college                                                      | 4. <input type="checkbox"/> |
| Prefer not to specify [INTERVIEWER NOTE: DO NOT READ]                      | 5. <input type="checkbox"/> |

**Adherence to market research codes of conduct**

- **I understand that this market research project is sponsored by a pharmaceutical company and is being carried out within the Market Research codes of conduct.**
- **I understand that the aim of this research is to gain my views for market research purposes only and is not intended to be promotional.**
- **I agree that anything I see or read during this research should be treated as confidential. Any information presented during the course of this research is done so solely to explore reactions to such information and should be assumed to represent hypotheses about what can be said about a product or disease area. It should not be used to influence decisions outside the research setting.**
- **I understand that the identity of respondents is confidential and none of my details will be passed on to any 3rd party.**
- **I understand that the outputs of this research may be used by the sponsoring pharmaceutical company in a promotional or external context at an aggregated level or using anonymised quotes.**
  - **I understand that any information I disclose will be treated in the strictest confidence and the results of the research aggregated to provide an overall picture of attitudes to the areas being covered in this survey. No answers will be attributable to me as an individual.**
  - **I understand that I have the right to withdraw from the survey at any time and to withhold information as I see fit.**
  - **I understand that the agency is required to pass on to their client, who is a manufacturer of medicines, details of any adverse events/ side effects related to their own products that are mentioned during the course of market research. Although what is mentioned in the survey will, of course, be treated in confidence, should an adverse event/ side effect that I, or someone I know, be raised the agency will need to report this, so that they can learn more about the safety of their medicines. I understand that if I decide to disclose my personal details in association with such a report, this information will be disclosed to the sponsoring pharmaceutical company.**

**By proceeding to the next screen, I confirm that I have read, understood and accept the points above and am happy to proceed with the market research survey on this basis.**

**Agree and continue**

**Refuse and close**

In the event of an adverse event/side effect being raised during the analysis of this research, are you willing to waive the confidentiality given to you under the Market Research Codes of conduct specifically in relation to that adverse event?

Yes

No

Survey of Oncologists' Awareness and Understanding of Personalised Medicine

SCREENING QUESTIONNAIRE – v7 - DRAFT

Quotas:

|               | U<br>K | Franc<br>e | Germa<br>ny | Spai<br>n | Ital<br>y | Argenti<br>na | Braz<br>il | Japa<br>n | Chin<br>a | Russi<br>a | Turke<br>y | Saud<br>i<br>Arabi<br>a |
|---------------|--------|------------|-------------|-----------|-----------|---------------|------------|-----------|-----------|------------|------------|-------------------------|
| <b>N</b><br>= | 70     | 70         | 70          | 70        | 70        | 50            | 60         | 50        | 75        | 75         | 60         | 50                      |

SCREENER

**S1. Are you a practicing physician actively involved in the day to day management of patients with cancer?**

[PN: SINGLE CODE]

|            |                             |                 |
|------------|-----------------------------|-----------------|
| Yes        | 1. <input type="checkbox"/> | CONTINUE        |
| No         | 2. <input type="checkbox"/> | THANK AND CLOSE |
| Don't know | 3. <input type="checkbox"/> | THANK AND CLOSE |

**S2. Which is your primary medical specialty?**

[PN: SINGLE CODE]

|                                       |                             |                 |
|---------------------------------------|-----------------------------|-----------------|
| Clinical oncologist                   | 1. <input type="checkbox"/> | CONTINUE        |
| Medical oncologist                    | 2. <input type="checkbox"/> | CONTINUE        |
| Clinical and medical oncologist       | 3. <input type="checkbox"/> | CONTINUE        |
| Gastroenterologist                    | 4. <input type="checkbox"/> | CONTINUE        |
| [JAPAN ONLY] Breast cancer specialist | 5. <input type="checkbox"/> | CONTINUE        |
| [JAPAN ONLY] Lung cancer specialist   | 6. <input type="checkbox"/> | CONTINUE        |
| Other                                 | 8. <input type="checkbox"/> | THANK AND CLOSE |
| Don't know                            | 9. <input type="checkbox"/> | THANK AND CLOSE |

**S3. For how many years have you been practicing in your primary specialty?**

|             |                                                                                |
|-------------|--------------------------------------------------------------------------------|
| _____ years | CLOSE IF LESS THAN 3, OR MORE THAN 35 YEARS<br>IF 3 YEARS TO 35 YEARS CONTINUE |
| Don't know  | THANK AND CLOSE                                                                |

**S4. Please indicate below, by selecting the appropriate boxes, if you are personally involved in the treatment of patients with the following malignancies.**



[PN: MULTICODE POSSIBLE]

|                                         |                             |                 |
|-----------------------------------------|-----------------------------|-----------------|
| Breast cancer                           | 1. <input type="checkbox"/> | CONTINUE        |
| Non-small-cell lung carcinoma (NSCLC)   | 2. <input type="checkbox"/> | CONTINUE        |
| Metastatic colorectal cancer (mCRC)     | 3. <input type="checkbox"/> | CONTINUE        |
| None of these [PN: MUTUTALLY EXCLUSIVE] | 4. <input type="checkbox"/> | THANK AND CLOSE |
| Don't know [PN: MUTUTALLY EXCLUSIVE]    | 5. <input type="checkbox"/> | THANK AND CLOSE |

**S5. Approximately how many advanced (stage III/IV) patients with the following malignancies do you treat in an average month?**

[PN: ONLY SHOW CANCER TYPES SELECTED IN S4]

|                                                     |                        |                                                                                    |
|-----------------------------------------------------|------------------------|------------------------------------------------------------------------------------|
| Stage IV Breast cancer                              | ___ patients per month | CLOSE IF TREAT FEWER THAN 15 PATIENTS PER MONTH IN TOTAL ACROSS ALL 3 MALIGNANCIES |
| Stage IIIb/IV Non-small-cell lung carcinoma (NSCLC) | ___ patients per month |                                                                                    |
| Stage IV Metastatic colorectal cancer (mCRC)        | ___ patients per month |                                                                                    |

- RESPONDENTS COUNT TOWARDS CANCER TYPE QUOTA BASED ON WHICH IS THE LARGEST GROUP IN S5
- IN CASE OF EVEN SPLIT, PLEASE ASSIGN AT RANDOM
- RECRUIT 50% TOWARDS MCR, AND 25% EACH TOWARDS BREAST CANCER AND NSCLC

**S6. Are you employed by a pharmaceutical company in any way, other than participating in clinical trials conducted by the company and/or advisory boards with contract**

[PN: MULTICODE POSSIBLE]

|            |                             |                 |
|------------|-----------------------------|-----------------|
| Yes        | 1. <input type="checkbox"/> | THANK AND CLOSE |
| No         | 2. <input type="checkbox"/> | CONTINUE        |
| Don't know | 3. <input type="checkbox"/> | THANK AND CLOSE |

- MONITOR IN FIELD AND ENSURE GOOD GEOGRAPHICAL SPREAD PER MARKET

## ASSESSING PHYSICIANS ATTITUDES TOWARDS PATIENT UNDERSTANDING OF CANCER

*For the next few questions please think about your patients' understanding of cancer and cancer treatment.*

ASK ALL

**19. Which one of the following statements do you believe describes most of your cancer patients' understanding of types of cancer?**

[PN: SINGLE CODE ONLY]

|                                                                                                                                                                                                                                                                                    |                             |
|------------------------------------------------------------------------------------------------------------------------------------------------------------------------------------------------------------------------------------------------------------------------------------|-----------------------------|
| There is only one type of cancer, and it is the same regardless of where it appears in the body                                                                                                                                                                                    | 1. <input type="checkbox"/> |
| There are different types of cancer, but cancers that affect one organ (e.g. the lungs) are always the same                                                                                                                                                                        | 2. <input type="checkbox"/> |
| There are different types of cancer that can affect a single organ and the types of cancer affecting one organ are different than the types of cancer affecting a different organ, e.g. there are different types of breast cancer and breast cancer is different from lung cancer | 3. <input type="checkbox"/> |
| Don't know                                                                                                                                                                                                                                                                         | 4. <input type="checkbox"/> |

ASK ALL

**20. Which one of the following statements do you believe describes most of your cancer patients' understanding of types of cancer drugs?**

[PN: SINGLE CODE ONLY]

|                                                        |                             |
|--------------------------------------------------------|-----------------------------|
| All cancer drugs can target mainly cancer cells        | 1. <input type="checkbox"/> |
| All cancer drugs affect healthy cells and cancer cells | 2. <input type="checkbox"/> |
| Some cancer drugs can mostly target only cancer cells  | 3. <input type="checkbox"/> |
| Don't know                                             | 4. <input type="checkbox"/> |

ASK ALL

**21. Which one of the following statements do you believe describes most of your cancer patients' understanding of how cancer drugs work?**

[PN: SINGLE CODE ONLY]

|                                                                      |                             |
|----------------------------------------------------------------------|-----------------------------|
| All cancer drugs work equally well in all cancer patients            | 1. <input type="checkbox"/> |
| Some cancer drugs work better in some cancer patients than in others | 2. <input type="checkbox"/> |
| Don't know                                                           | 3. <input type="checkbox"/> |

*The next set of questions is about your cancer patients' awareness and understanding of personalized medicine.*

ASK ALL

**22. Which one of the following statements do you believe describes most of your cancer patients' understanding of personalized cancer treatment?**

[PN: SINGLE CODE ONLY]

|                                                                                                               |                             |
|---------------------------------------------------------------------------------------------------------------|-----------------------------|
| A person can be tested to see whether some particular cancer treatments could work for them                   | 1. <input type="checkbox"/> |
| There is no method of testing to determine which cancer treatments might work (or work better) in some people | 2. <input type="checkbox"/> |
| Don't know                                                                                                    | 3. <input type="checkbox"/> |

ASK ALL

**23. In general, do you think your cancer patients understand that it's possible, in some circumstances, for a person to have their tumour tested to help their doctor decide which treatment(s) to give?**

[PN: SINGLE CODE]

|            |                             |
|------------|-----------------------------|
| Yes        | 1. <input type="checkbox"/> |
| No         | 2. <input type="checkbox"/> |
| Don't know | 3. <input type="checkbox"/> |

*Now please think about your own attitudes towards personalized medicine for cancer patients.*

ASK ALL

**24. How much, if anything, would you say you know about biomarker testing?**

[PN: SINGLE CODE]

|                                 |                             |
|---------------------------------|-----------------------------|
| A great deal                    | 1. <input type="checkbox"/> |
| A fair amount                   | 2. <input type="checkbox"/> |
| Just a little                   | 3. <input type="checkbox"/> |
| Heard of, know nothing about it | 4. <input type="checkbox"/> |
| Never heard of it               | 5. <input type="checkbox"/> |
| Don't know                      | 6. <input type="checkbox"/> |

**25. Do you ever perform biomarker tests on your cancer patients?**

[PN: SINGLE CODE]

|            |                             |                 |
|------------|-----------------------------|-----------------|
| Yes        | 1. <input type="checkbox"/> | CONTINUE TO Q8  |
| No         | 2. <input type="checkbox"/> | CONTINUE TO Q10 |
| Don't know | 3. <input type="checkbox"/> | CONTINUE TO Q10 |

ASK IF CODING 1 at Q7

**26. Which tests, if any, do you typically perform on cancer patients?**

Please choose all that apply.

[PN: MULTICODE POSSIBLE]

|                                  |                              |
|----------------------------------|------------------------------|
| EGFR expression test             | 1. <input type="checkbox"/>  |
| EGFR mutation test               | 2. <input type="checkbox"/>  |
| KRAS mutation test               | 3. <input type="checkbox"/>  |
| NRAS mutation test               | 4. <input type="checkbox"/>  |
| HER2 mutation test               | 5. <input type="checkbox"/>  |
| HER2 expression test             | 6. <input type="checkbox"/>  |
| BRAF mutation test               | 7. <input type="checkbox"/>  |
| Hormone receptor test            | 8. <input type="checkbox"/>  |
| Biological therapy receptor test | 9. <input type="checkbox"/>  |
| Additional tumour biopsy         | 10. <input type="checkbox"/> |
| Other (please specify)           | 11. <input type="checkbox"/> |
| Don't know [PN: SINGLE CODE]     | 12. <input type="checkbox"/> |

ASK IF CODING 1 AT Q7

**27. What factor(s) influence whether or not you perform biomarker tests for a given cancer patient?**

Please choose all that apply.

[PN: MULTICODE POSSIBLE]

|                        |                             |
|------------------------|-----------------------------|
| Progression of disease | 1. <input type="checkbox"/> |
|------------------------|-----------------------------|

|                                                                       |                              |
|-----------------------------------------------------------------------|------------------------------|
| Patient preference                                                    | 2. <input type="checkbox"/>  |
| Patients ability to pay for the test                                  | 3. <input type="checkbox"/>  |
| Availability of particular test needed where I practice               | 4. <input type="checkbox"/>  |
| Cost to hospital                                                      | 5. <input type="checkbox"/>  |
| Time to obtain test results                                           | 6. <input type="checkbox"/>  |
| Guidelines                                                            | 7. <input type="checkbox"/>  |
| Not part of routine diagnosis                                         | 8. <input type="checkbox"/>  |
| Logistics not established (e.g. sample tissue from another hospital)  | 9. <input type="checkbox"/>  |
| Limited availability of testing facilities in hospital                | 10. <input type="checkbox"/> |
| Whether the result of the biomarker test influences treatment options | 11. <input type="checkbox"/> |
| Whether the biomarker test predicts outcome                           | 12. <input type="checkbox"/> |
| Other (please specify)                                                | 13. <input type="checkbox"/> |
| Don't know <a href="#">[PN: SINGLE CODE]</a>                          | 14. <input type="checkbox"/> |

ASK IF CODING 2 AT Q7

**28. Why don't you perform biomarker testing on your cancer patients?**

*Please choose all that apply.*

|                                                   |                             |
|---------------------------------------------------|-----------------------------|
| Results take too long to get                      | 1. <input type="checkbox"/> |
| Tests are too expensive / not reimbursed          | 2. <input type="checkbox"/> |
| Tests are not available where I practice          | 3. <input type="checkbox"/> |
| Not part of treatment guidelines where I practice | 4. <input type="checkbox"/> |
| I don't want to delay treatment                   | 5. <input type="checkbox"/> |



|                                                                       |                              |
|-----------------------------------------------------------------------|------------------------------|
| Patients don't want to delay treatment                                | 6. <input type="checkbox"/>  |
| Patients don't understand the benefits                                | 7. <input type="checkbox"/>  |
| The result of the biomarker test does not influence treatment options | 8. <input type="checkbox"/>  |
| The biomarker test does not predict outcome                           | 9. <input type="checkbox"/>  |
| Other (please specify)                                                | 10. <input type="checkbox"/> |
| Don't know [PN: SINGLE CODE]                                          | 11. <input type="checkbox"/> |

#### ASK ALL

### 29. What would help you to use biomarker tests more often in your practice?

*Please choose all that apply.*

|                                                                                          |                              |
|------------------------------------------------------------------------------------------|------------------------------|
| Information and tools to help patients understand biomarker testing                      | 1. <input type="checkbox"/>  |
| Training for myself (genomics, diagnostic testing, and targeted therapies)               | 2. <input type="checkbox"/>  |
| Greater availability of biomarker tests where I practice                                 | 3. <input type="checkbox"/>  |
| Improved reimbursement conditions for biomarker testing                                  | 4. <input type="checkbox"/>  |
| Overall reduction in cost of testing                                                     | 5. <input type="checkbox"/>  |
| Reduction in time taken to receive results                                               | 6. <input type="checkbox"/>  |
| Inclusion in local/hospital guidelines                                                   | 7. <input type="checkbox"/>  |
| Other (please specify)                                                                   | 8. <input type="checkbox"/>  |
| Nothing would help me use biomarker tests more often in my practice<br>[PN: SINGLE CODE] | 9. <input type="checkbox"/>  |
| Don't know [PN: SINGLE CODE]                                                             | 10. <input type="checkbox"/> |

ASK ALL

**30. In general, do you think your cancer patients would be prepared to delay their treatment for additional tumour testing if there was a chance they could receive a drug that might work better for them?**

[PN: SINGLE CODE]

|            |                             |                 |
|------------|-----------------------------|-----------------|
| Yes        | 1. <input type="checkbox"/> | CONTINUE TO Q12 |
| No         | 2. <input type="checkbox"/> | CONTINUE TO Q13 |
| Don't know | 3. <input type="checkbox"/> | CONTINUE TO Q14 |

ASK ALL SELECTING YES AT Q12. SCRIPT TO APPEAR DYNAMICALLY ON SAME PAGE AS Q12.

**31. How long do you think they would be willing to delay their treatment for additional tumour testing for?**

[PN: SINGLE CODE]

|                     |                             |
|---------------------|-----------------------------|
| 3-4 days            | 1. <input type="checkbox"/> |
| Up to one week      | 2. <input type="checkbox"/> |
| Up to two weeks     | 3. <input type="checkbox"/> |
| Up to a month       | 4. <input type="checkbox"/> |
| As long as it takes | 5. <input type="checkbox"/> |
| Don't know          | 6. <input type="checkbox"/> |

ASK ALL

**32. In general, do you think your cancer patients would be prepared for you to perform a tumour re-biopsy if there was a chance they could receive a drug that might work better for them?**

[PN: SINGLE CODE]

|            |                             |
|------------|-----------------------------|
| Yes        | 1. <input type="checkbox"/> |
| No         | 2. <input type="checkbox"/> |
| Don't know | 3. <input type="checkbox"/> |

ASK ALL

**33. In general, do you think your cancer patients would allow a hospital to keep a sample of their cancer for future research?**

[PN: SINGLE CODE]

|            |                             |
|------------|-----------------------------|
| Yes        | 1. <input type="checkbox"/> |
| No         | 2. <input type="checkbox"/> |
| Don't know | 3. <input type="checkbox"/> |

ASK ALL

**34. In general do you think your cancer patients would want you to give them information about all of the available treatment options for their cancer?**

[PN: SINGLE CODE]

|            |                             |                 |
|------------|-----------------------------|-----------------|
| Yes        | 1. <input type="checkbox"/> | CONTINUE TO Q13 |
| No         | 2. <input type="checkbox"/> | CONTINUE TO Q14 |
| Don't know | 3. <input type="checkbox"/> | CONTINUE TO Q14 |

ASK ALL SELECTING YES AT Q16

**35. If yes, why would that be?**

*Please choose all that apply.*

[PN: MULTI CODE]

|                                                                                                                              |                             |
|------------------------------------------------------------------------------------------------------------------------------|-----------------------------|
| For general information / education                                                                                          | 1. <input type="checkbox"/> |
| So that they can be involved in decisions about their treatment                                                              | 2. <input type="checkbox"/> |
| To be aware of potential side effects                                                                                        | 3. <input type="checkbox"/> |
| They would want a little information for reference, but would prefer me to make all major decisions about treatment for them | 4. <input type="checkbox"/> |
| Other (please specify)                                                                                                       | 5. <input type="checkbox"/> |
| Don't know                                                                                                                   | 6. <input type="checkbox"/> |

ASK ALL

**36. Do you think your cancer patients feel fully informed and understand their treatment when it is explained by you?**

[PN: SINGLE CODE]

|            |                             |
|------------|-----------------------------|
| Always     | 1. <input type="checkbox"/> |
| Sometimes  | 2. <input type="checkbox"/> |
| Rarely     | 3. <input type="checkbox"/> |
| Never      | 4. <input type="checkbox"/> |
| Don't know | 5. <input type="checkbox"/> |

ASK ALL

**37. Do you think cancer patients need more information to help them understand the different types of cancers and how they progress?**

[PN: SINGLE CODE]

|            |                             |
|------------|-----------------------------|
| Yes        | 1. <input type="checkbox"/> |
| No         | 2. <input type="checkbox"/> |
| Don't know | 3. <input type="checkbox"/> |

ASK ALL

**38. In your opinion, is the treatment decision a shared decision-making process between the doctor and/or multidisciplinary team and patient?**

[PN: SINGLE CODE]

|            |                             |
|------------|-----------------------------|
| Yes        | 1. <input type="checkbox"/> |
| No         | 2. <input type="checkbox"/> |
| Don't know | 3. <input type="checkbox"/> |

ASK ALL

**39. In your opinion, to what extent are treatment duration or termination of cancer therapy decisions influenced by clinical parameters versus patient influence?**

|                                         |
|-----------------------------------------|
| <b>Termination of Therapy Decisions</b> |
| _% influenced by clinical parameters    |
| _% influenced by patient influence      |

Don't know

ASK ALL

**40. What are the main reasons for stopping therapy before disease progression (select top 3)?**

*Please choose up to three answers that apply.*

|                                                                                            |                              |
|--------------------------------------------------------------------------------------------|------------------------------|
| Concerns about patient compliance                                                          | 1. <input type="checkbox"/>  |
| Patient request to change therapy                                                          | 2. <input type="checkbox"/>  |
| Patient refusal of treatment                                                               | 3. <input type="checkbox"/>  |
| Insufficient efficacy                                                                      | 4. <input type="checkbox"/>  |
| Tolerability problems                                                                      | 5. <input type="checkbox"/>  |
| Poor performance status of patient                                                         | 6. <input type="checkbox"/>  |
| Patient could no longer afford therapy/ co-payment [PN: DO NOT SHOW PALE GREY TEXT FOR UK] | 7. <input type="checkbox"/>  |
| Patient characteristics                                                                    | 8. <input type="checkbox"/>  |
| Not reimbursed                                                                             | 9. <input type="checkbox"/>  |
| Other (please specify)                                                                     | 10. <input type="checkbox"/> |
| Don't know [PN: SINGLE CODE]                                                               | 11. <input type="checkbox"/> |

ASK ALL

**41. What sources of information, if any, are available to your cancer patients to support them in making treatment decisions about their cancer?**

[PN: MULTI CODE]

|                                      |                              |
|--------------------------------------|------------------------------|
| Family, friends                      | 1. <input type="checkbox"/>  |
| Nurses                               | 3. <input type="checkbox"/>  |
| Support groups                       | 4. <input type="checkbox"/>  |
| Internet sites                       | 5. <input type="checkbox"/>  |
| Newspaper or magazine articles       | 6. <input type="checkbox"/>  |
| Hospital patient information leaflet | 7. <input type="checkbox"/>  |
| Other 1 (please specify)             | 8. <input type="checkbox"/>  |
| Other 2 (please specify)             | 9. <input type="checkbox"/>  |
| Other 2 (please specify)             | 10. <input type="checkbox"/> |
| None [PN: EXCLUSIVE]                 | 11. <input type="checkbox"/> |
| Don't know                           | 12. <input type="checkbox"/> |

ASK ALL

**42. For each of the sources you selected, how informative do you think each one is to cancer patients? Please use a scale from 1 to 10 where 1 is “not at all informative” and 10 is “extremely informative”.**

[PN: MULTI CODE]

|                                | 1 – not at all informative | 2                        | 3                        | 4                        | 5                        | 6                        | 7                        | 8                        | 9                        | 10 – extremely informative | Don't know               |
|--------------------------------|----------------------------|--------------------------|--------------------------|--------------------------|--------------------------|--------------------------|--------------------------|--------------------------|--------------------------|----------------------------|--------------------------|
| Family, friends                | <input type="checkbox"/>   | <input type="checkbox"/> | <input type="checkbox"/> | <input type="checkbox"/> | <input type="checkbox"/> | <input type="checkbox"/> | <input type="checkbox"/> | <input type="checkbox"/> | <input type="checkbox"/> | <input type="checkbox"/>   | <input type="checkbox"/> |
| Nurses                         | <input type="checkbox"/>   | <input type="checkbox"/> | <input type="checkbox"/> | <input type="checkbox"/> | <input type="checkbox"/> | <input type="checkbox"/> | <input type="checkbox"/> | <input type="checkbox"/> | <input type="checkbox"/> | <input type="checkbox"/>   | <input type="checkbox"/> |
| Support groups                 | <input type="checkbox"/>   | <input type="checkbox"/> | <input type="checkbox"/> | <input type="checkbox"/> | <input type="checkbox"/> | <input type="checkbox"/> | <input type="checkbox"/> | <input type="checkbox"/> | <input type="checkbox"/> | <input type="checkbox"/>   | <input type="checkbox"/> |
| Internet sites                 | <input type="checkbox"/>   | <input type="checkbox"/> | <input type="checkbox"/> | <input type="checkbox"/> | <input type="checkbox"/> | <input type="checkbox"/> | <input type="checkbox"/> | <input type="checkbox"/> | <input type="checkbox"/> | <input type="checkbox"/>   | <input type="checkbox"/> |
| Newspaper or magazine articles | <input type="checkbox"/>   | <input type="checkbox"/> | <input type="checkbox"/> | <input type="checkbox"/> | <input type="checkbox"/> | <input type="checkbox"/> | <input type="checkbox"/> | <input type="checkbox"/> | <input type="checkbox"/> | <input type="checkbox"/>   | <input type="checkbox"/> |
| Other 1 (please specify)       | <input type="checkbox"/>   | <input type="checkbox"/> | <input type="checkbox"/> | <input type="checkbox"/> | <input type="checkbox"/> | <input type="checkbox"/> | <input type="checkbox"/> | <input type="checkbox"/> | <input type="checkbox"/> | <input type="checkbox"/>   | <input type="checkbox"/> |
| Other 2 (please specify)       | <input type="checkbox"/>   | <input type="checkbox"/> | <input type="checkbox"/> | <input type="checkbox"/> | <input type="checkbox"/> | <input type="checkbox"/> | <input type="checkbox"/> | <input type="checkbox"/> | <input type="checkbox"/> | <input type="checkbox"/>   | <input type="checkbox"/> |
| Other 3 (please specify)       | <input type="checkbox"/>   | <input type="checkbox"/> | <input type="checkbox"/> | <input type="checkbox"/> | <input type="checkbox"/> | <input type="checkbox"/> | <input type="checkbox"/> | <input type="checkbox"/> | <input type="checkbox"/> | <input type="checkbox"/>   | <input type="checkbox"/> |

**43. Would you be willing for Ipsos MORI to re-contact you in the next 12 months about this survey?**

|     |                             |
|-----|-----------------------------|
| Yes | 1. <input type="checkbox"/> |
| No  | 2. <input type="checkbox"/> |

**THANK AND CLOSE**
