# Supplementary material
Source: PubMed Central journal article supplement (PMC4786350)
Supplement: supp_the2015-0279_Supplemental_Figures.pdf [file supp_the2015-0279_Supplemental_Figures.pdf]

Supplemental Figures for:  
Awareness, Understanding, and Adoption of Precision Medicine to Deliver Personalized Treatment for Patients with Cancer:  
A Multinational Survey Comparison of Physicians and Patients  
Fortunato Ciardiello et al.

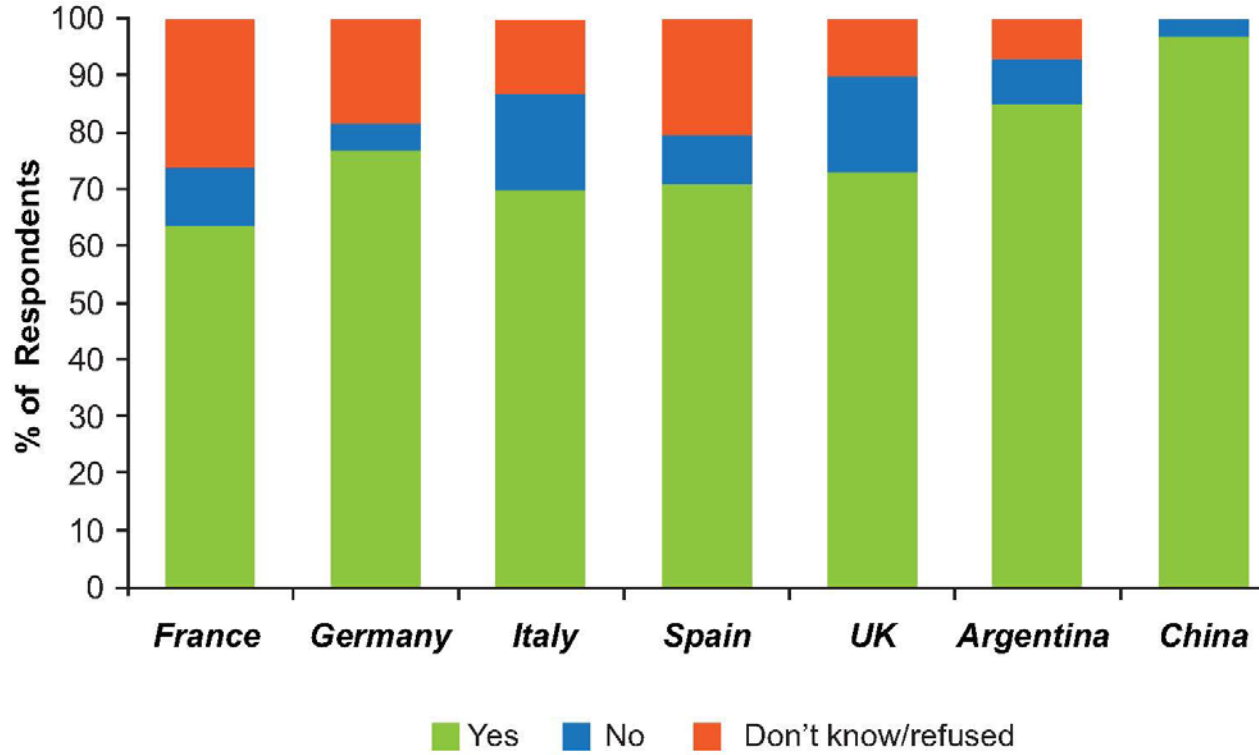

**Figure S1.** Patient responses to the question “Do you think it’s possible in some circumstances for a person to have their tumor tested to help their doctor decide which treatment(s) to give?” presented by region.

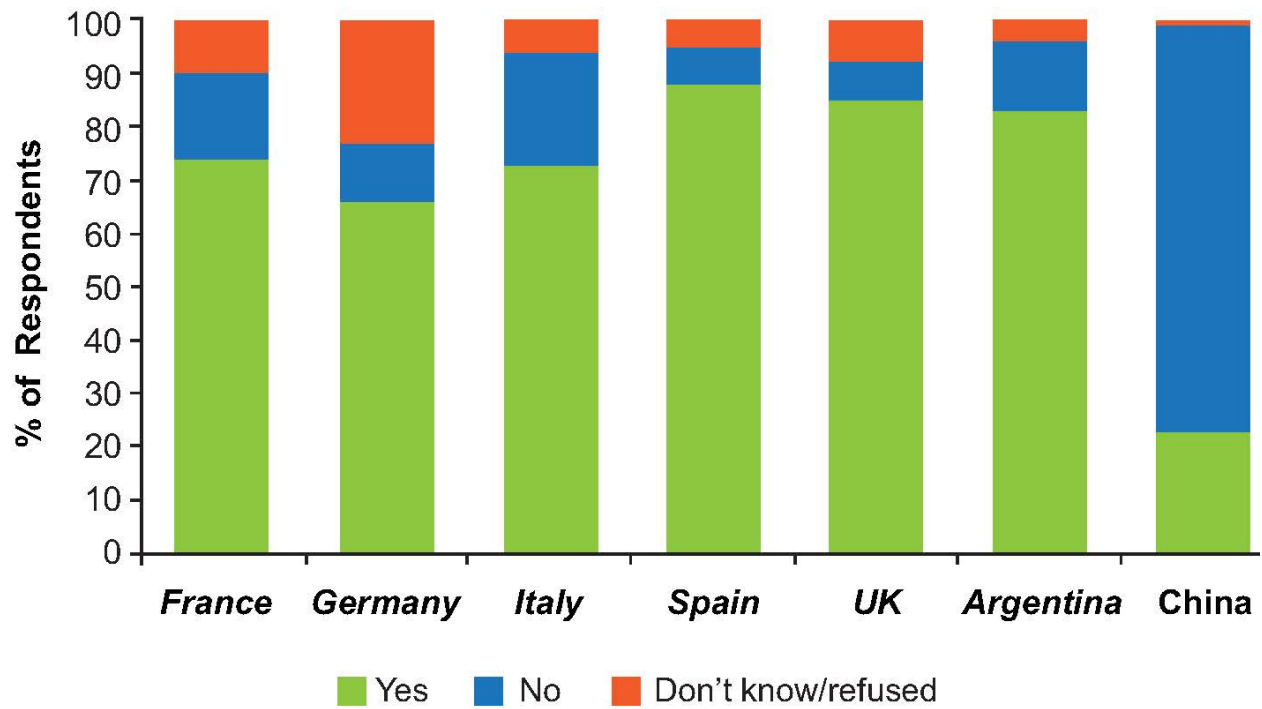

**Figure S2.** Patient responses to the question “Would you be prepared for the doctor to perform a tumor re-biopsy if there was a chance you could receive a drug that might work better for you?” presented by region.
